# Supplementary material for: Improvement of Carotenoids’ Production by Increasing the Activity of Beta-Carotene Ketolase with Different Strategies
Source: MDPI journal article supplement (doi:10.3390/microorganisms12020377), 2024-02-12
Supplement: s1 [file s1]

## Supplementary

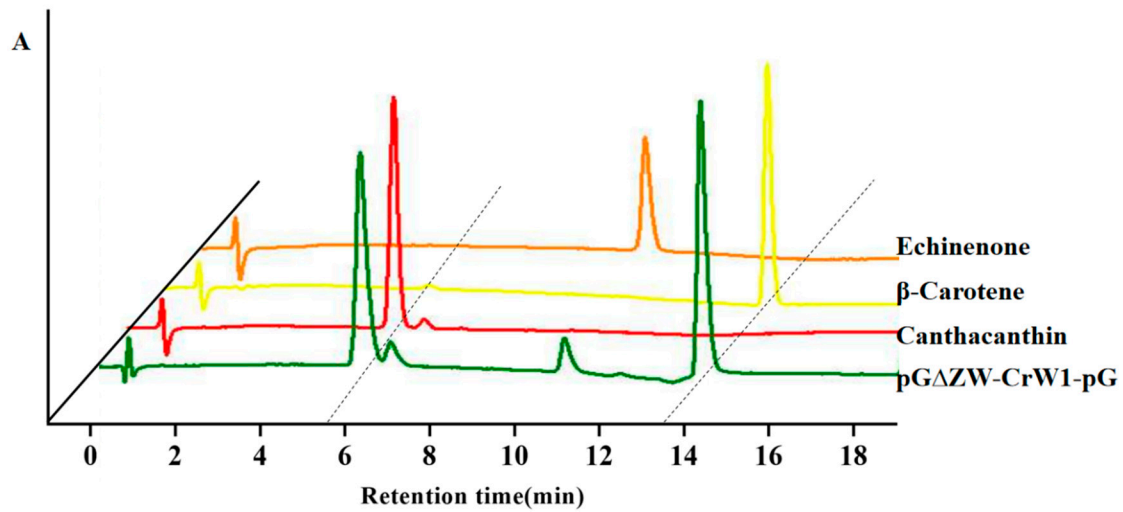

**Figure S1.** HPLC diagram of standards and extracts from *E.coli* harboring pGΔZW-CrW1-pG.

**Table S1.** Plasmids constructed or adopted in this study.

| Plasmids                  | Plasmid information                                                    | Source                              |
|---------------------------|------------------------------------------------------------------------|-------------------------------------|
| pACCAR16Δcrtx             | pET, T7, HpE, CrtI, CrtB, CrtY, Chl <sup>r</sup>                       | Shanghai Jiaotong University        |
| pG-KJE8                   | pET, T7, Dnak, DnaJ, GrpE, GroES, GroE, Chl <sup>r</sup>               | General Biosystems (Anhui) Co., Ltd |
| p30CrtW <sub>Bsp</sub>    | pET, T7, CrtW <sub>Bsp</sub> , Kan <sup>r</sup>                        | This study                          |
| p32CrtW <sub>Bsp</sub>    | pET, T7, CrtW <sub>Bsp</sub> , Amp <sup>r</sup>                        | This lab                            |
| pCold-CrtW <sub>Bsp</sub> | pET, cspA, CrtW <sub>Bsp</sub> , Amp <sup>r</sup>                      | This study                          |
| pGST-CrtW <sub>Bsp</sub>  | pET, T7, GST, CrtW <sub>Bsp</sub> , Kan <sup>r</sup>                   | This study                          |
| pMBP-CrtW <sub>Bsp</sub>  | pET, T7, MBP, CrtW <sub>Bsp</sub> , Kan <sup>r</sup>                   | This study                          |
| pGlpF-CrtW <sub>Bsp</sub> | pET, T7, GlpF, CrtW <sub>Bsp</sub> , Kan <sup>r</sup>                  | This study                          |
| pSUMO-CrtW <sub>Bsp</sub> | pET, T7, SUMO, CrtW <sub>Bsp</sub> , Kan <sup>r</sup>                  | This study                          |
| pHpW1                     | pET, T7, HpW1, Kan <sup>r</sup>                                        | This study                          |
| pHpW2                     | pET, T7, HpW2, Kan <sup>r</sup>                                        | This study                          |
| pCrW1                     | pET, T7, CrW1, Kan <sup>r</sup>                                        | This study                          |
| pCzW1                     | pET, T7, CzW1, Kan <sup>r</sup>                                        | This study                          |
| pGΔZW-CrtW <sub>Bsp</sub> | pET, T7, HpE, CrtI, CrtB, CrtY, CrtW <sub>Bsp</sub> , Amp <sup>r</sup> | This lab                            |
| pGΔZW-HpW1                | pET, T7, HpE, CrtI, CrtB, CrtY, HpW1, Amp <sup>r</sup>                 | This lab                            |
| pGΔZW-HpW2                | pET, T7, HpE, CrtI, CrtB, CrtY, HpW2, Amp <sup>r</sup>                 | This lab                            |
| pGΔZW-CrW1                | pET, T7, HpE, CrtI, CrtB, CrtY, CrW1, Amp <sup>r</sup>                 | This lab                            |
| pGΔZW-CzW1                | pET, T7, HpE, CrtI, CrtB, CrtY, CzW1, Amp <sup>r</sup>                 | This lab                            |

**Table S2.** Primers used in this study.

| ID    | Primer sequence (5'→3')                        | used for           |
|-------|------------------------------------------------|--------------------|
| HpW1F | CAGTcatatgCACCACCACCACCACCAGCTGGCCGCCACCGTG    | pHpW1 construction |
| HpW1R | ACTGaagcttCTTATGCCGGCACCAGAC                   |                    |
| HpW2F | CAGTcatatgCACCACCACCACCACCAGGTGCATGCAGGTCAG    | pHpW2 construction |
| HpW2R | ACTGaagcttCTTATGCCAGGGCAGGCA                   |                    |
| CrW1F | CAGTcatatgCACCACCACCACCACCACGGTCCGGGTATTCAGCCG | pCrW1 construction |
| CrW1R | ACTGaagcttCTTAGGCCATAACGCCCA                   |                    |
| CzW1F | CAGTcatatgCACCACCACCACCACCACGCCCTGATGTGACCCAT  | pCzW1 construction |
| CzW1R | ACTGaagcttCTTAATTCACCAGCTGAG                   |                    |

The restriction sites are indicated by lowercase letters.
